# Supplementary material for: Genomic Organization of Microsatellites and LINE-1-like Retrotransposons: Evolutionary Implications for Ctenomys minutus (Rodentia: Ctenomyidae) Cytotypes
Source: MDPI journal article supplement (doi:10.3390/ani12162091), 2022-08-16
Supplement: s1 [file s1]

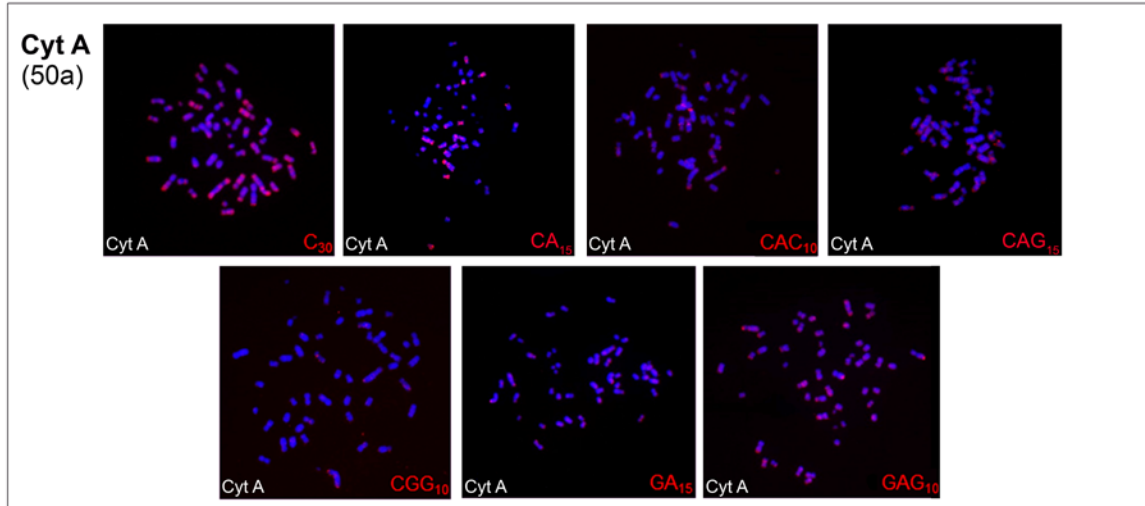

**Figure S1.** Fluorescence in situ hybridization experiments with motif probes in cytotype A of *Ctenomys minutus*. Probes used are indicated in the lower right corner of the images and the cytotype in the lower left corner of the images.

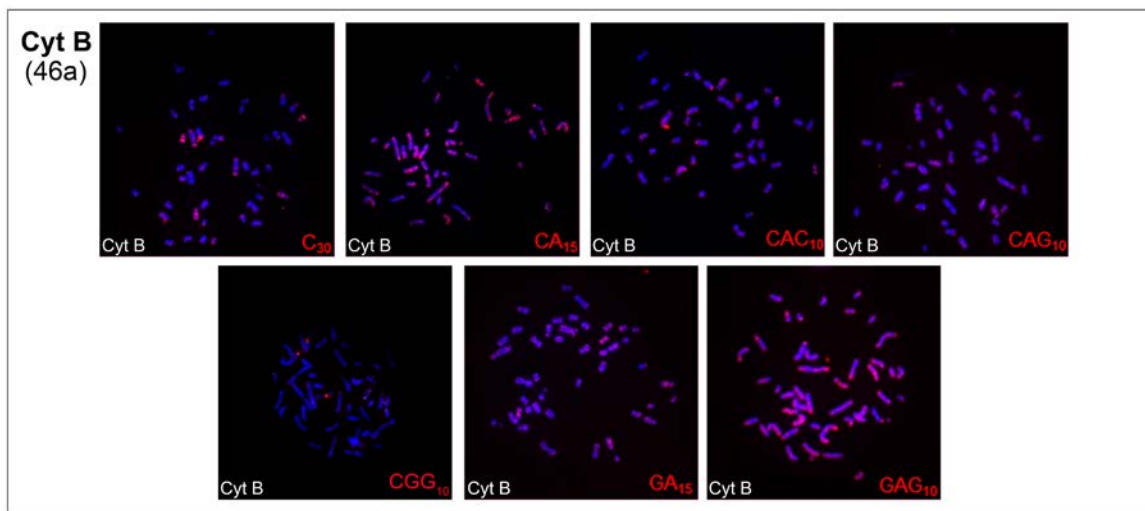

**Figure S2.** Fluorescence in situ hybridization experiments with motif probes in cytotype B of *Ctenomys minutus*. Probes used are indicated in the lower right corner of the images and the cytotype in the lower left corner of the images.

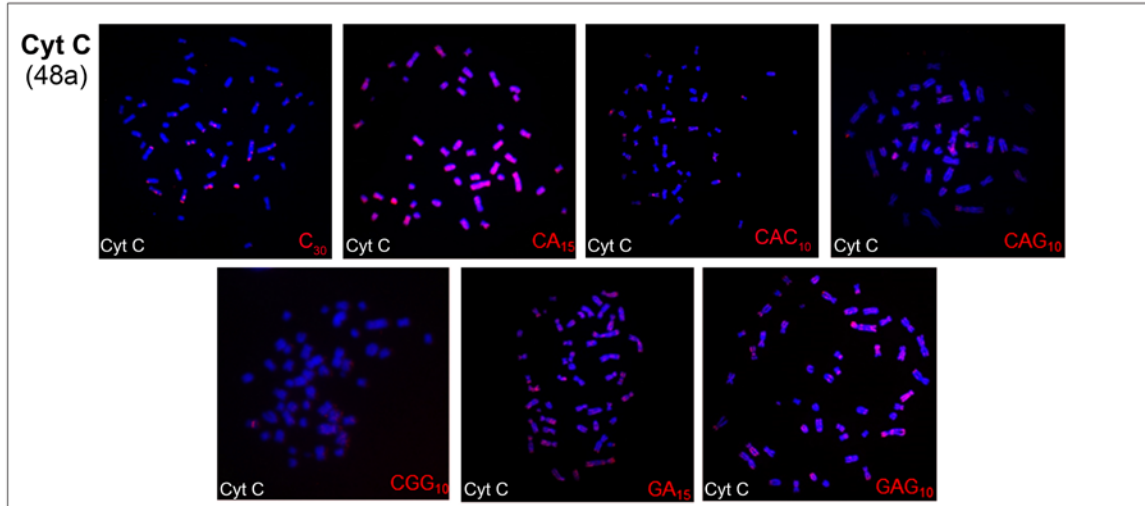

**Figure S3.** Fluorescence in situ hybridization experiments with motif probes in cytotype C of *Ctenomys minutus*. Probes used are indicated in the lower right corner of the images and the cytotype in the lower left corner of the images.

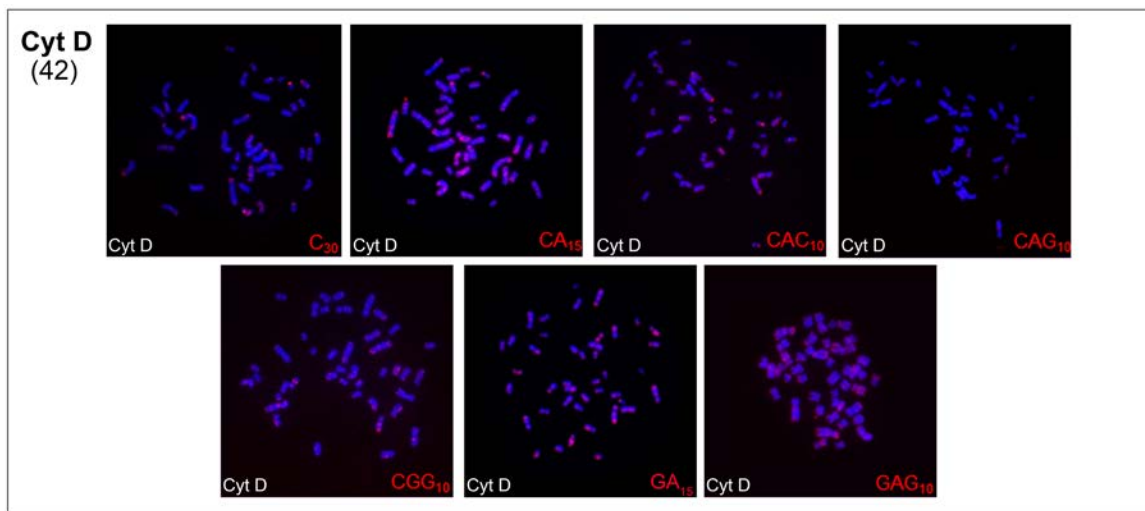

**Figure S4.** Fluorescence in situ hybridization experiments with motif probes in cytotype D of *Ctenomys minutus*. Probes used are indicated in the lower right corner of the images and the cytotype in the lower left corner of the images.

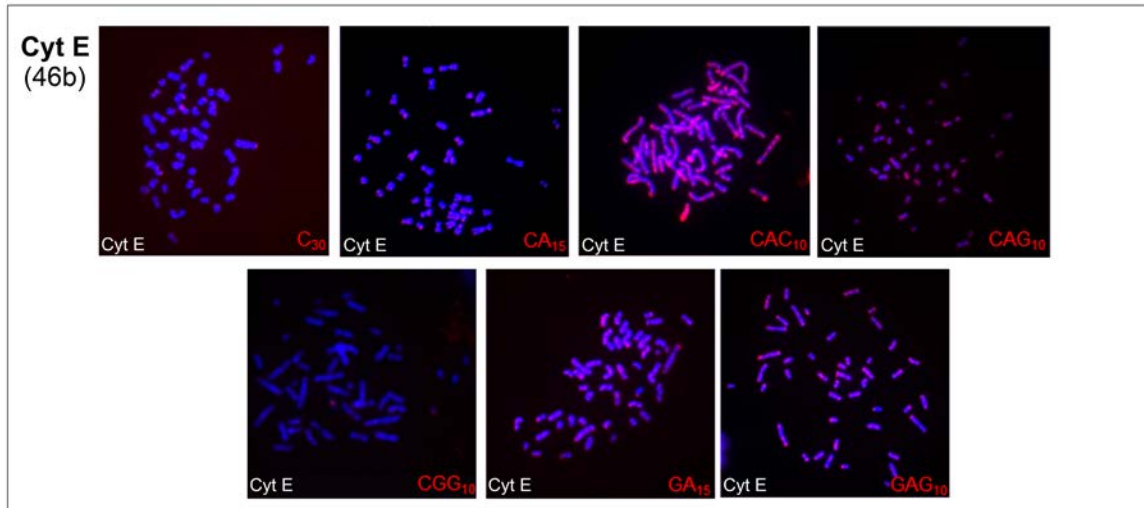

**Figure S5.** Fluorescence in situ hybridization experiments with motif probes in cytotype E of *Ctenomys minutus*. Probes used are indicated in the lower right corner of the images and the cytotype in the lower left corner of the images.

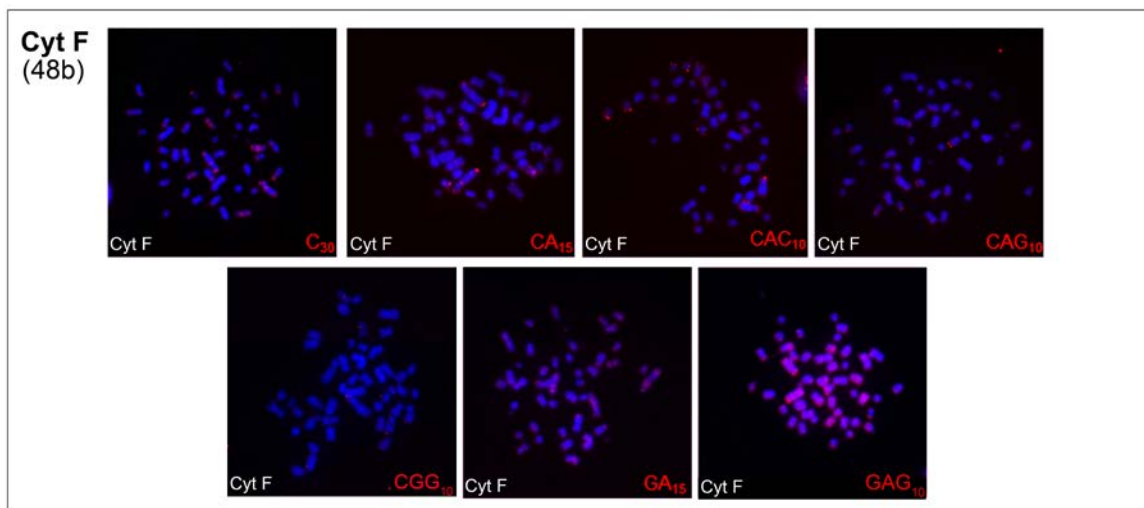

**Figure S6.** Fluorescence in situ hybridization experiments with motif probes in cytotype F of *Ctenomys minutus*. Probes used are indicated in the lower right corner of the images and the cytotype in the lower left corner of the images.

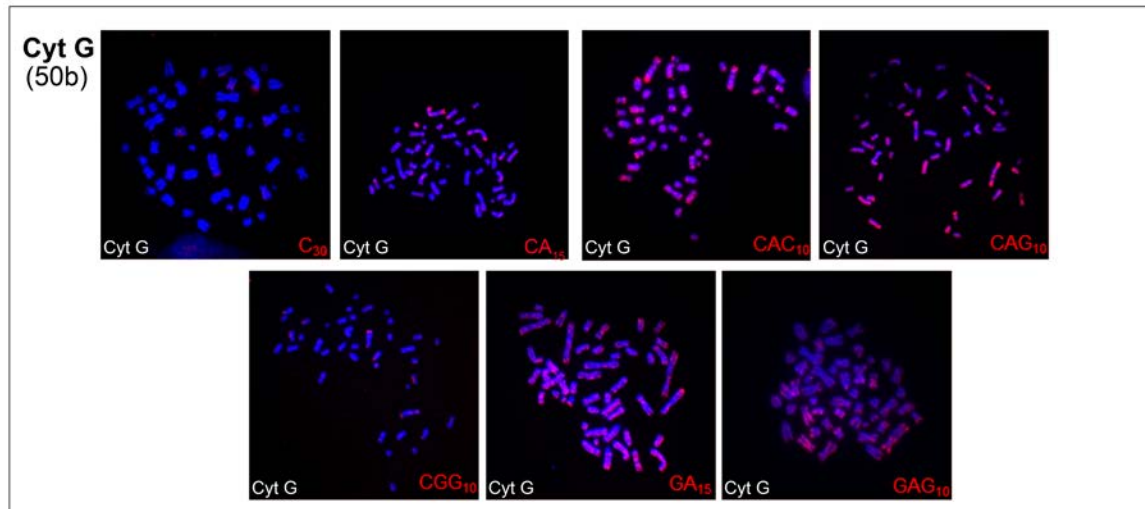

**Figure S7.** Fluorescence in situ hybridization experiments with motif probes in cytotype G of *Ctenomys minutus*. Probes used are indicated in the lower right corner of the images and the cytotype in the lower left corner of the images.
